# Supplementary material for: Co-immobilization of PPL and GOx on DUT-5/PVDF hybrid membranes and catalytic activity in the cascade oxidation of glucose and styrene
Source: Royal Society of Chemistry journal article supplement (doi:10.1039/d2nj05293h), 2022-12-19
Supplement: d2nj05293h1.pdf [file d2nj05293h1.pdf]

## Co-immobilization of PPL and GOx on DUT-5/PVDF hybrid membranes and the catalytic activity in the cascade oxidation of glucose and styrene

Defeng Hu, Rongzhong Li, Yide Han, Hao Meng and Xia Zhang\*

*Department of Chemistry, College of Sciences, Northeastern University, Shenyang 110819, P. R. China.*

\*Corresponding author.

Email: xzhang@mail.neu.edu.cn

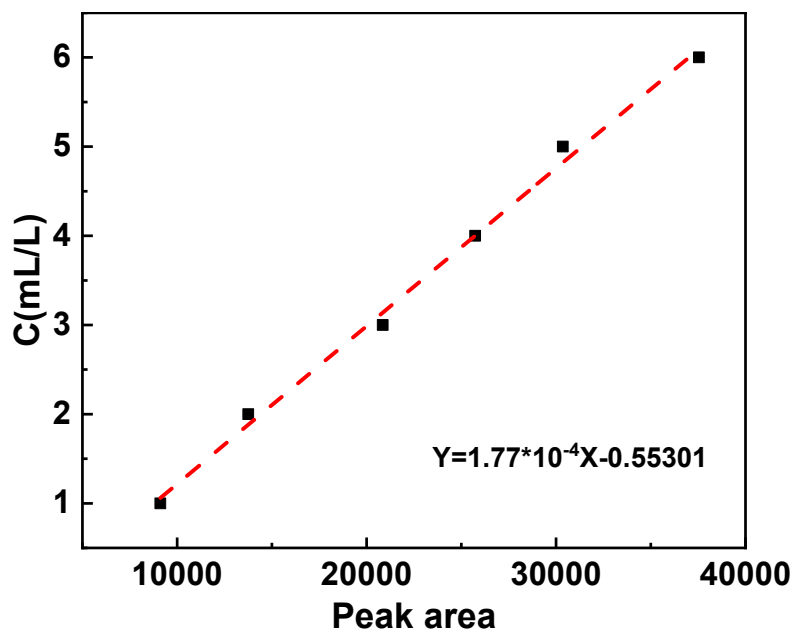

Fig. S1 The working curve of styrene oxide obtained from GC analyses. The standard curve equation is  $Y=0.000177*X-0.55301$ , and the linear correlation coefficient  $R^2 = 0.9944$ .

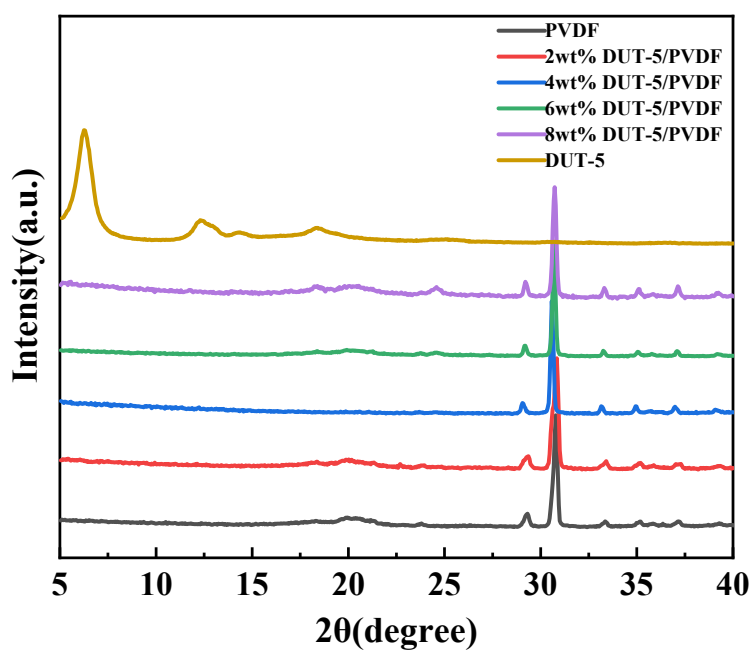

Fig. S2 The XRD patterns of DUT-5, PVDF and DUT-5/PVDF hybrid membranes

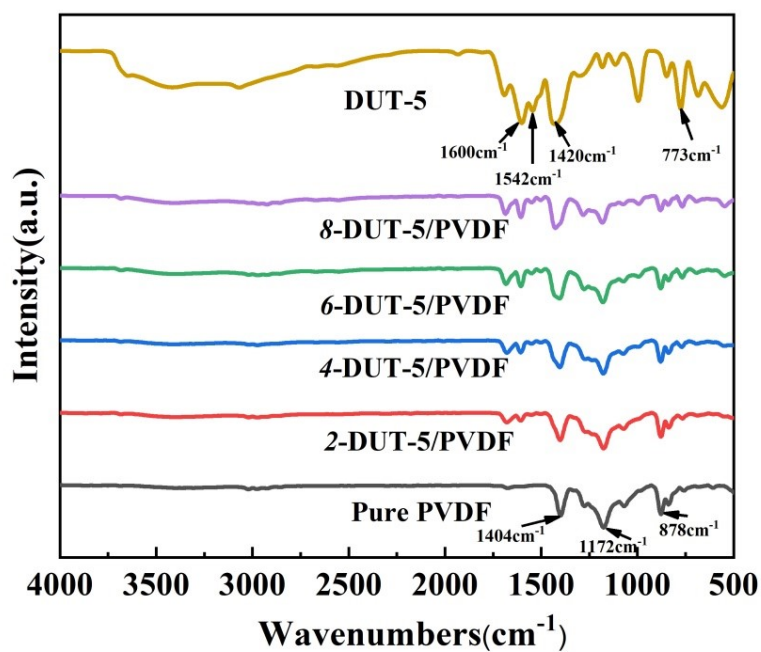

Fig. S3 The FT-IR spectra of PVDF, DUT-5 and DUT-5/PVDF hybrid membranes

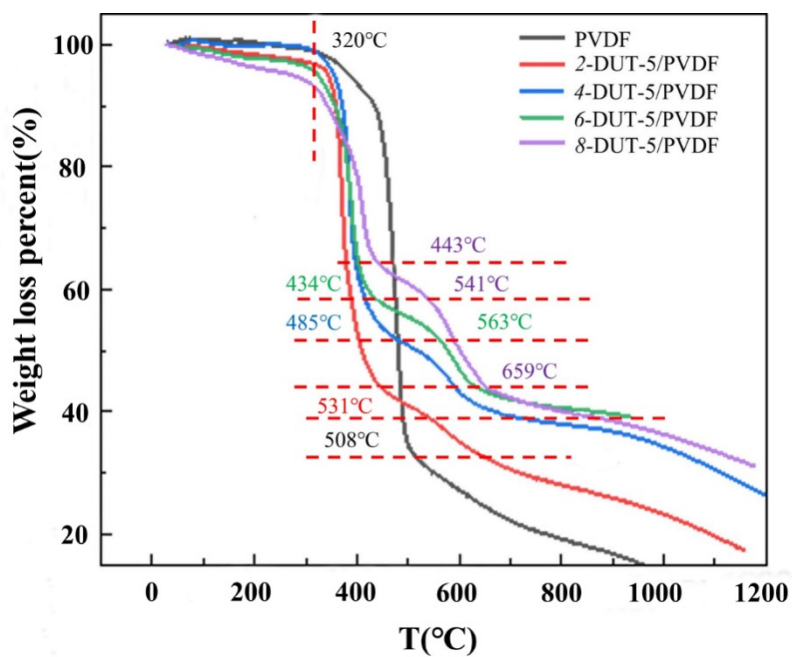

Fig. S4 TG curves of PVDF and DUT-5/PVDF hybrid membranes

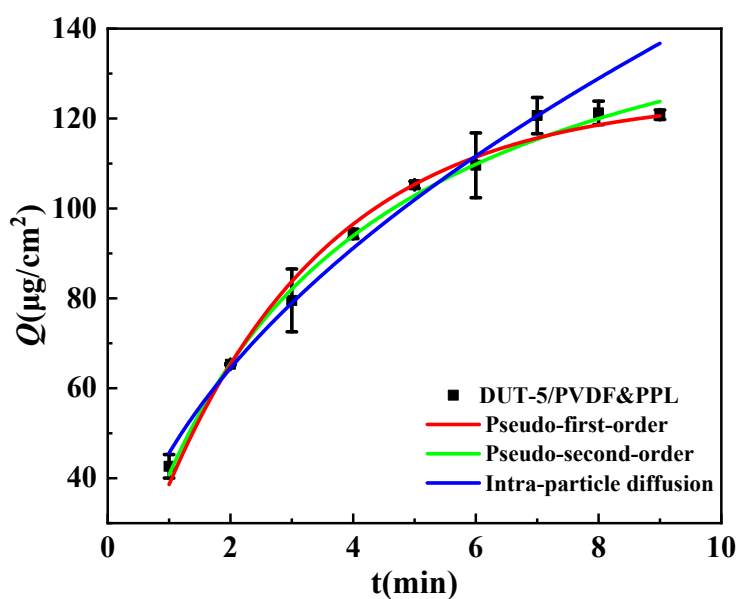

Fig. S5 Fitting curves of the adsorption kinetics of PPL on hybrid membranes by using pseudo-first, pseudo-second, and intra-particle models

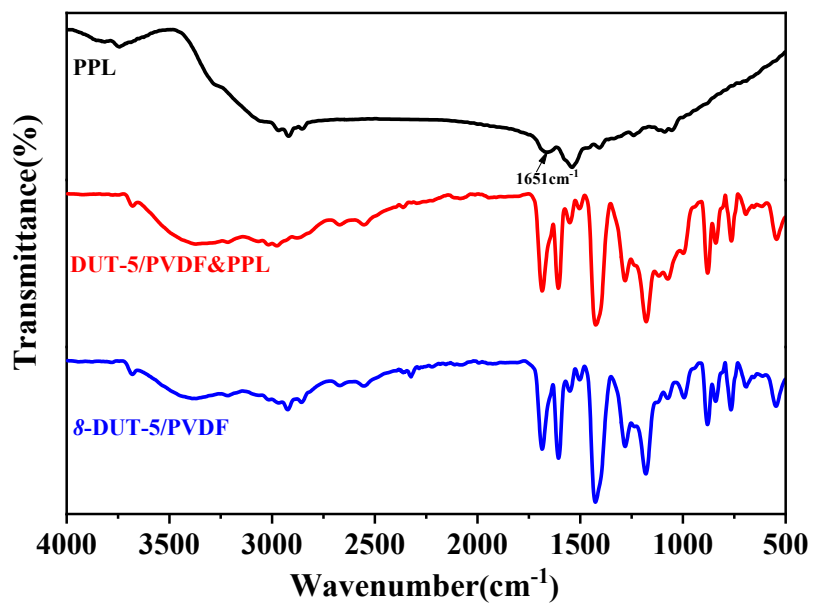

Fig. S6 The FT-IR spectra of PPL, 8-DUT-5/PVDF and DUT-5/PVDF&PPL hybrid membranes

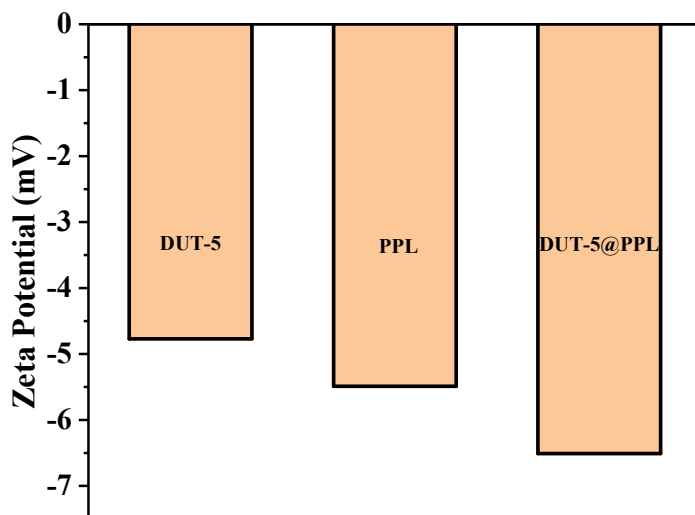

Fig. S7 Zeta potentials of DUT-5, PPL and DUT-5@PPL

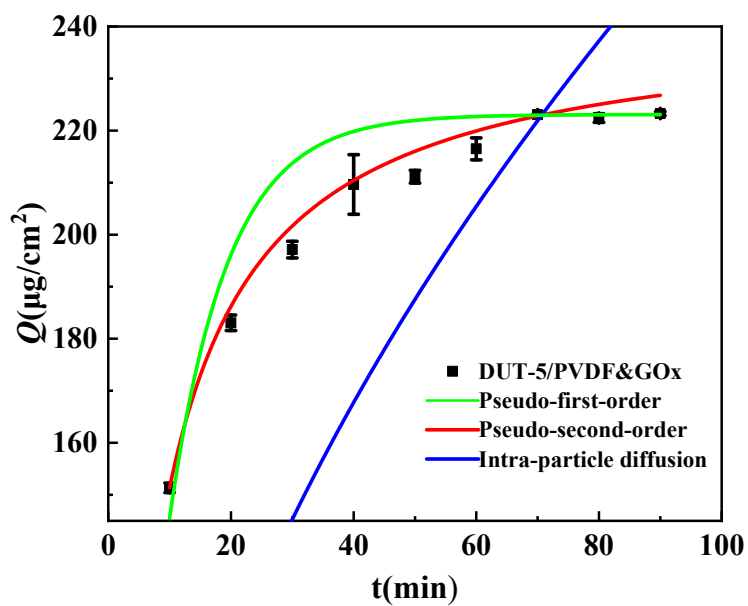

Fig. S8 Fitting curves of GO<sub>x</sub> on hybrid membranes by using pseudo-first, pseudo-second and intra-particle models

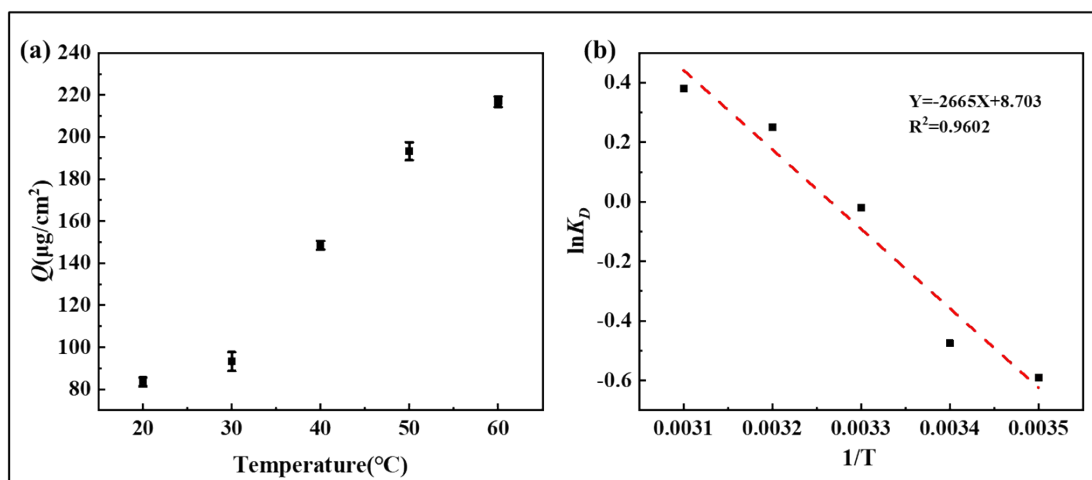

Fig. S9 (a) Adsorption capacities of GO<sub>x</sub> on DUT-5 /PVDF at different temperature; (b) Plots of  $\ln K_D$  versus  $1/T$  for GO<sub>x</sub> adsorption on DUT-5/PVDF

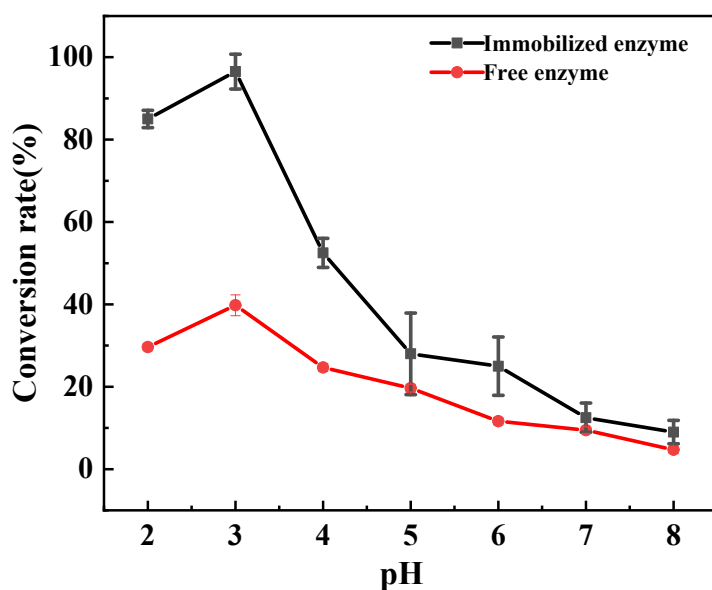

Fig. S10 The conversion rates of styrene catalyzed by the co-immobilized enzymes and free enzymes at changed pH varied from 2.0 to 8.0.

Table. S1 Simulating parameters of the adsorption isotherm for PPL on the hybrid membranes by using Langmuir and Freundlich models

| Enzyme | Langmuir                               |                 |        | Freundlich                                           |      |        |
|--------|----------------------------------------|-----------------|--------|------------------------------------------------------|------|--------|
|        | $Q_m$<br>( $\mu\text{g}/\text{cm}^2$ ) | $K_a$<br>(L/mg) | $R^2$  | $K_F$ ( $\text{mg}^{1-1/n}\text{L}^{1/n}/\text{g}$ ) | n    | $R^2$  |
| PPL    | 154.17                                 | 3.23            | 0.9812 | 116.45                                               | 3.21 | 0.9161 |

Table. S2 Simulating parameters of the adsorption kinetic of GO<sub>x</sub> on DUT-5/PVDF by using the kinetics models

| Sample              | 6-DUT-5/PVDF&GO <sub>x</sub>                           |         |
|---------------------|--------------------------------------------------------|---------|
| pseudo-first order  | $q_e(\mu\text{g}\cdot\text{cm}^{-2})$                  | 223.08  |
|                     | $k_1(\text{min}^{-1})$                                 | 0.1056  |
|                     | $R^2$                                                  | 0.9484  |
| pseudo-second order | $q_e(\mu\text{g}\cdot\text{cm}^{-2})$                  | 244.83  |
|                     | $k_2(\text{cm}^2\cdot\mu\text{g}^{-1}\text{min}^{-1})$ | 0.0069  |
|                     | $R^2$                                                  | 0.9786  |
| Internal diffusion  | $K_d(\mu\text{g}\cdot\text{cm}^{-2}\text{min}^{-1/2})$ | 26.5224 |
|                     | $R^2$                                                  | -1.07   |

Table. S3 Calculated adsorption isotherm parameters for GO<sub>x</sub> on DUT-5/PVDF by using the Langmuir and Freundlich equations

| Sample          | Langmuir                               |                 |        | Freundlich                                           |       |        |
|-----------------|----------------------------------------|-----------------|--------|------------------------------------------------------|-------|--------|
|                 | $Q_m$<br>( $\mu\text{g}/\text{cm}^2$ ) | $K_a$<br>(L/mg) | $R^2$  | $K_F$ ( $\text{mg}^{1-1/n}\text{L}^{1/n}/\text{g}$ ) | n     | $R^2$  |
| GO <sub>x</sub> | 330.05                                 | 2.1239          | 0.9695 | 217.18                                               | 3.195 | 0.8760 |

Table. S4 The thermodynamic parameters for GO<sub>x</sub> adsorption on DUT-5/PVDF

| Adsorbents                 | Temperature | $\Delta H^\theta$                   | $\Delta S^\theta$                                    | $\Delta G^\theta$                   |
|----------------------------|-------------|-------------------------------------|------------------------------------------------------|-------------------------------------|
|                            | (K)         | ( $\text{kJ}\cdot\text{mol}^{-1}$ ) | ( $\text{J}\cdot\text{mol}^{-1}\cdot\text{K}^{-1}$ ) | ( $\text{kJ}\cdot\text{mol}^{-1}$ ) |
| DUT-5/PVDF&GO <sub>x</sub> | 293         | 22.156                              | 72.357                                               | 0.956                               |
|                            | 303         |                                     |                                                      | 0.233                               |
|                            | 313         |                                     |                                                      | -0.491                              |
|                            | 323         |                                     |                                                      | -1.214                              |
|                            | 333         |                                     |                                                      | -1.938                              |
